# Supplementary material for: Culture-Dependent and -Independent Analyses Reveal the Diversity, Structure, and Assembly Mechanism of Benthic Bacterial Community in the Ross Sea, Antarctica
Source: PubMed Central journal article supplement (PMC6856632; doi:10.3389/fmicb.2019.02523), 2019-11-08
Supplement: Data_Sheet_1.pdf [file Data_Sheet_1.pdf]

Table S1 Geographical and chemical characteristics of sediment samples collected from the Ross Sea.

| Group    | Sample | Longitude | Latitude | Salinity<br>(PSU) | Temperature<br>(°C) | Chlorophyll<br>(µg/L) | CDOM<br>(ppb) | Depth<br>(m) | pH   |
|----------|--------|-----------|----------|-------------------|---------------------|-----------------------|---------------|--------------|------|
| Inshore  | JB01   | 165.5694  | -77.5883 | 33.84             | 3.15                | 5.81                  | 2.01          | 774          | 7.96 |
|          | R02    | 165.133   | -74.785  | 33.93             | 3.36                | 5.51                  | 2.39          | 719          | 8.29 |
|          | R04    | 166.7767  | -74.7667 | 34.05             | 0.35                | 1.18                  | 1.85          | 901          | 7.95 |
|          | R08    | 165.012   | -75.003  | 34.12             | 3.08                | 7.15                  | 2.01          | 892          | 8.77 |
|          | R09    | 165.998   | -75.0033 | 33.53             | 2.87                | 6.01                  | 2.01          | 1032         | 8.04 |
|          | R14    | 164.8047  | -74.935  | 34.13             | 3.58                | 7.26                  | 1.93          | 901          | 8.28 |
|          | R18    | 163.765   | -74.913  | 34.23             | 3.48                | 6.39                  | 2.16          | 46           | 8.49 |
|          | R19    | 170.3944  | -72.2544 | 33.83             | 3.34                | 5.14                  | 2.08          | 516          | 9.05 |
|          | (mean) | -         | -        | 33.96             | 2.90                | 5.56                  | 2.06          | 723          | 8.35 |
| Offshore | JB02   | 169.9867  | -76.8442 | 34.13             | 1.05                | 2.18                  | 1.77          | 760          | 8.61 |
|          | JB03   | 170.6983  | -75.8036 | 33.33             | 0.53                | 1.72                  | 1.77          | 615          | 7.65 |
|          | JB04   | 172.3725  | -75.3011 | 33.71             | 0.88                | 2.09                  | 1.77          | 511          | 7.99 |
|          | JB05   | 173.1881  | -74.7553 | 33.46             | 0.67                | 1.8                   | 1.77          | 497          | 7.58 |
|          | R17    | 167.9092  | -75.2303 | 32.14             | -0.33               | 1.71                  | 1.85          | 374          | 8.65 |
|          | (mean) | -         | -        | 33.35             | 0.56                | 1.90                  | 1.79          | 551          | 8.10 |

Table S2 Spearman's rank correlation analysis between environmental variables of the sediment samples collected from the Ross Sea. Data at bottom left are  $r$  values; data at top right are  $p$  values.

| Variable    | Salinity | Temperature | Chlorophyll | CDOM  | Depth | pH    |
|-------------|----------|-------------|-------------|-------|-------|-------|
| Salinity    |          | 0.028       | 0.099       | 0.287 | 0.404 | 0.765 |
| Temperature | 0.61     |             | 5.08E-07    | 0.002 | 0.635 | 0.218 |
| Chlorophyll | 0.48     | 0.95        |             | 0.009 | 0.527 | 0.184 |
| CDOM        | 0.32     | 0.77        | 0.69        |       | 0.860 | 0.204 |
| Depth       | 0.25     | 0.15        | 0.19        | -0.05 |       | 0.617 |
| pH          | 0.09     | 0.37        | 0.39        | 0.38  | -0.15 |       |

Table S3 Sequencing processing and estimates of alpha diversity of the sediment samples collected from the Ross Sea. Welch's t-tests of Chao1, ACE, Shannon and Simpson indices between the two groups was performed by R.

| Group    | Sample | Valid reads | Qualified sequences | Coverage (%) | OTUs | Chao1  | ACE    | Shannon | Simpson |
|----------|--------|-------------|---------------------|--------------|------|--------|--------|---------|---------|
| Inshore  | JB01   | 32857       | 19222               | 99.82        | 228  | 232.84 | 233.74 | 5.06    | 0.94    |
|          | R02    | 29167       | 17790               | 99.81        | 199  | 292.00 | 283.80 | 5.75    | 0.96    |
|          | R04    | 36375       | 22164               | 99.86        | 187  | 183.23 | 179.27 | 3.40    | 0.79    |
|          | R08    | 36357       | 21976               | 99.83        | 265  | 219.53 | 221.55 | 5.25    | 0.93    |
|          | R09    | 35336       | 23034               | 99.82        | 152  | 203.07 | 193.08 | 4.52    | 0.91    |
|          | R14    | 36678       | 22599               | 99.81        | 220  | 253.00 | 241.00 | 4.93    | 0.93    |
|          | R18    | 37262       | 23449               | 99.89        | 186  | 191.47 | 193.67 | 4.42    | 0.87    |
|          | R19    | 35476       | 22889               | 99.86        | 188  | 190.06 | 189.46 | 5.17    | 0.95    |
|          | (mean) | 34939       | 21640               | 99.84        | 203  | 220.65 | 216.95 | 4.82    | 0.91    |
| Offshore | JB02   | 20998       | 13710               | 99.84        | 94   | 109.40 | 114.63 | 3.57    | 0.87    |
|          | JB03   | 37016       | 23533               | 99.89        | 122  | 127.00 | 126.99 | 3.01    | 0.79    |
|          | JB04   | 37159       | 24088               | 99.9         | 91   | 94.09  | 98.73  | 2.76    | 0.77    |
|          | R17    | 36449       | 24266               | 99.93        | 43   | 42.33  | 42.42  | 1.91    | 0.53    |
|          | JB05   | 38899       | 26243               | 99.89        | 136  | 136.91 | 142.64 | 2.84    | 0.77    |
|          | (mean) | 34104       | 22368               | 99.89        | 97   | 101.95 | 105.08 | 2.82    | 0.74    |
| p-value  | -      | -           | -                   | -            | -    | <2e-6  | <7e-7  | <5e-8   | <8e-12  |

Table S4 ANCOM test results for differential abundance of bacterial taxa at the family and genus level. High W values indicate significant differences in abundance levels between inshore and offshore group. Higher W value indicates more significant difference in abundance level. The ANCOM analysis was achieved by QIIME2.

| Percentile           | 0       | 25    | 50    | 75    | 100    | 0        | 25    | 50    | 75    | 100   | Reject null hypothesis | W |
|----------------------|---------|-------|-------|-------|--------|----------|-------|-------|-------|-------|------------------------|---|
| Group                | Inshore |       |       |       |        | Offshore |       |       |       |       |                        |   |
| f_Alcaligenaceae     | 1.07    | 1.18  | 1.33  | 1.37  | 1.42   | 1.00     | 1.00  | 1.02  | 1.02  | 1.06  | FALSE                  | 2 |
| f_Alcanivoracaceae   | 1.32    | 4.98  | 7.59  | 10.51 | 15.89  | 1.00     | 1.00  | 1.00  | 1.02  | 1.04  | FALSE                  | 8 |
| f_Alteromonadaceae   | 1.42    | 15.11 | 35.06 | 41.89 | 54.86  | 1.50     | 14.60 | 51.70 | 69.75 | 73.89 | FALSE                  | 0 |
| f_Aurantimonadaceae  | 1.01    | 1.05  | 1.13  | 1.15  | 1.54   | 1.00     | 1.00  | 1.00  | 1.07  | 1.15  | FALSE                  | 1 |
| f_Bacillaceae        | 1.00    | 1.01  | 1.01  | 1.03  | 1.16   | 1.01     | 1.01  | 1.04  | 1.16  | 1.22  | FALSE                  | 2 |
| f_Bacteroidaceae     | 4.58    | 9.97  | 18.77 | 35.01 | 118.35 | 2.14     | 4.07  | 14.01 | 22.69 | 23.21 | FALSE                  | 0 |
| f_Balneolaceae       | 1.00    | 1.09  | 1.26  | 3.77  | 11.64  | 1.00     | 1.00  | 1.00  | 1.01  | 1.02  | FALSE                  | 0 |
| f_Barnesiellaceae    | 1.00    | 1.01  | 1.04  | 1.10  | 1.26   | 1.00     | 1.00  | 1.01  | 1.02  | 1.04  | FALSE                  | 2 |
| f_Bdellovibrionaceae | 1.00    | 1.00  | 1.00  | 1.07  | 1.15   | 1.00     | 1.00  | 1.00  | 1.00  | 1.00  | FALSE                  | 1 |
| f_Brucellaceae       | 1.00    | 1.00  | 1.00  | 1.00  | 1.03   | 1.00     | 1.00  | 1.00  | 1.00  | 1.00  | FALSE                  | 0 |
| f_Burkholderiaceae   | 1.04    | 1.05  | 1.14  | 1.23  | 2.55   | 1.03     | 1.09  | 1.21  | 1.56  | 1.78  | FALSE                  | 1 |
| f_Caulobacteraceae   | 1.01    | 1.03  | 1.18  | 1.38  | 3.07   | 1.00     | 1.00  | 1.04  | 1.21  | 3.89  | FALSE                  | 0 |
| f_Chitinophagaceae   | 1.00    | 1.00  | 1.01  | 1.98  | 5.02   | 1.00     | 1.00  | 1.00  | 1.00  | 1.01  | FALSE                  | 0 |
| f_Chromatiaceae      | 1.00    | 1.00  | 1.00  | 1.04  | 2.72   | 1.00     | 1.00  | 1.00  | 1.00  | 1.00  | FALSE                  | 0 |
| f_Clostridiaceae     | 1.00    | 1.02  | 1.09  | 1.32  | 2.99   | 1.00     | 1.00  | 1.00  | 1.00  | 1.00  | FALSE                  | 1 |
| f_Comamonadaceae     | 1.01    | 1.03  | 1.06  | 1.09  | 1.56   | 1.00     | 1.03  | 1.04  | 1.09  | 1.48  | FALSE                  | 0 |
| f_Cryomorphaceae     | 1.00    | 1.00  | 1.00  | 1.21  | 2.57   | 1.00     | 1.00  | 1.00  | 1.00  | 1.00  | FALSE                  | 0 |

|                       |      |       |       |       |       |       |        |        |        |        |       |     |
|-----------------------|------|-------|-------|-------|-------|-------|--------|--------|--------|--------|-------|-----|
| f_Cyclobacteriaceae   | 1.01 | 1.15  | 2.33  | 3.96  | 6.42  | 1.00  | 1.00   | 1.00   | 1.00   | 1.00   | FALSE | 1   |
| f_Cytophagaceae       | 1.00 | 1.00  | 1.00  | 1.08  | 3.25  | 1.00  | 1.00   | 1.00   | 1.00   | 1.00   | FALSE | 0   |
| f_Desulfobacteraceae  | 1.00 | 1.01  | 1.07  | 1.19  | 1.92  | 1.00  | 1.00   | 1.02   | 1.04   | 1.04   | FALSE | 0   |
| f_Desulfobulbaceae    | 1.00 | 1.00  | 1.00  | 1.11  | 1.22  | 1.00  | 1.00   | 1.00   | 1.01   | 1.02   | FALSE | 0   |
| f_Desulfuromonadaceae | 1.00 | 1.00  | 1.03  | 1.13  | 1.71  | 1.00  | 1.00   | 1.04   | 1.04   | 1.05   | FALSE | 0   |
| f_Dietziaceae         | 1.00 | 1.00  | 1.03  | 1.10  | 1.27  | 1.00  | 1.00   | 1.00   | 1.00   | 1.01   | FALSE | 1   |
| f_Enterobacteriaceae  | 1.32 | 1.48  | 2.21  | 3.13  | 17.04 | 1.15  | 1.40   | 2.54   | 4.13   | 8.21   | FALSE | 0   |
| f_Erysipelotrichaceae | 1.01 | 1.04  | 1.10  | 1.18  | 1.59  | 1.00  | 1.00   | 1.05   | 1.06   | 1.10   | FALSE | 2   |
| f_Erythrobacteraceae  | 1.05 | 1.68  | 2.45  | 7.43  | 17.50 | 1.00  | 1.00   | 1.00   | 1.88   | 1.88   | FALSE | 0   |
| f_Flammeovirgaceae    | 1.11 | 2.04  | 3.99  | 5.84  | 7.21  | 1.00  | 1.00   | 1.00   | 1.00   | 1.02   | FALSE | 2   |
| f_Flavobacteriaceae   | 2.34 | 15.09 | 40.41 | 83.44 | 92.46 | 59.77 | 102.94 | 121.65 | 128.26 | 169.51 | FALSE | 4   |
| f_Fusobacteriaceae    | 1.77 | 2.21  | 4.56  | 6.75  | 25.04 | 1.14  | 1.70   | 3.99   | 5.10   | 5.60   | FALSE | 0   |
| f_Halomonadaceae      | 1.12 | 1.33  | 3.04  | 5.56  | 7.25  | 4.25  | 4.36   | 5.92   | 9.82   | 95.10  | FALSE | 0   |
| f_Hyphomicrobiaceae   | 1.07 | 1.23  | 1.90  | 3.01  | 6.52  | 1.01  | 1.06   | 1.22   | 1.36   | 1.91   | FALSE | 0   |
| f_Hyphomonadaceae     | 1.01 | 1.30  | 3.51  | 4.70  | 6.75  | 1.00  | 1.00   | 1.00   | 1.00   | 1.02   | FALSE | 2   |
| f_Idiomarinaceae      | 1.03 | 2.19  | 5.30  | 8.69  | 33.96 | 1.00  | 1.02   | 1.07   | 1.79   | 21.41  | FALSE | 0   |
| f_Ignavibacteriaceae  | 1.00 | 1.00  | 1.02  | 1.06  | 1.19  | 1.00  | 1.00   | 1.00   | 1.01   | 1.03   | FALSE | 1   |
| f_Kiloniellaceae      | 1.02 | 1.11  | 1.20  | 1.42  | 8.35  | 1.00  | 1.00   | 1.00   | 1.00   | 1.01   | FALSE | 0   |
| f_Kordiimonadaceae    | 1.00 | 1.02  | 1.05  | 1.20  | 1.97  | 1.00  | 1.00   | 1.00   | 1.00   | 1.00   | FALSE | 0   |
| f_Lachnospiraceae     | 1.65 | 2.14  | 4.07  | 5.72  | 17.93 | 1.12  | 1.35   | 3.17   | 4.55   | 4.85   | FALSE | 1   |
| f_Marinicellaceae     | 1.00 | 1.02  | 1.11  | 1.63  | 2.45  | 1.00  | 1.02   | 1.07   | 1.12   | 1.27   | FALSE | 0   |
| f_Marinilabiaceae     | 1.00 | 1.00  | 1.00  | 1.00  | 2.85  | 1.00  | 1.00   | 1.00   | 1.00   | 1.00   | FALSE | 0   |
| f_Methylobacteriaceae | 1.00 | 1.00  | 1.01  | 1.03  | 1.07  | 1.00  | 1.00   | 1.01   | 1.02   | 1.02   | FALSE | 1   |
| f_Microbacteriaceae   | 1.00 | 1.01  | 1.02  | 1.06  | 1.15  | 1.00  | 1.00   | 1.00   | 1.00   | 1.52   | FALSE | 0   |
| f_Moraxellaceae       | 1.01 | 1.09  | 1.23  | 1.42  | 1.68  | 2.99  | 4.43   | 8.28   | 15.23  | 34.05  | TRUE  | 496 |
| f_Neisseriaceae       | 1.00 | 1.00  | 1.02  | 1.03  | 1.10  | 1.00  | 1.00   | 1.00   | 1.01   | 1.01   | FALSE | 1   |

|                          |      |      |      |      |       |      |       |       |       |       |       |   |
|--------------------------|------|------|------|------|-------|------|-------|-------|-------|-------|-------|---|
| f_Nitrosomonadaceae      | 1.00 | 1.01 | 1.05 | 1.21 | 1.45  | 1.00 | 1.02  | 1.03  | 1.05  | 1.23  | FALSE | 0 |
| f_Nocardioideaceae       | 1.00 | 1.00 | 1.00 | 1.00 | 1.01  | 1.00 | 1.00  | 1.00  | 1.00  | 1.71  | FALSE | 0 |
| f_Oceanospirillaceae     | 1.00 | 1.00 | 1.00 | 1.00 | 1.00  | 1.00 | 1.00  | 1.00  | 1.00  | 1.17  | FALSE | 0 |
| f_Opitutaceae            | 1.02 | 1.08 | 1.15 | 1.34 | 1.52  | 1.00 | 1.00  | 1.00  | 1.00  | 1.00  | FALSE | 2 |
| f_Oxalobacteraceae       | 1.07 | 1.14 | 1.26 | 1.38 | 4.26  | 1.03 | 1.11  | 1.51  | 1.86  | 2.56  | FALSE | 0 |
| f_Paraprevotellaceae     | 1.02 | 1.09 | 1.13 | 1.22 | 1.69  | 1.00 | 1.02  | 1.08  | 1.12  | 1.14  | FALSE | 2 |
| f_Phycisphaeraceae       | 1.03 | 1.17 | 1.53 | 2.37 | 7.70  | 1.00 | 1.00  | 1.00  | 1.00  | 1.00  | FALSE | 0 |
| f_Phyllobacteriaceae     | 1.03 | 1.65 | 1.97 | 3.11 | 3.70  | 1.00 | 1.00  | 1.00  | 1.00  | 1.01  | FALSE | 3 |
| f_Pirellulaceae          | 1.02 | 1.06 | 1.23 | 1.73 | 3.30  | 1.00 | 1.00  | 1.00  | 1.01  | 1.02  | FALSE | 0 |
| f_Piscirickettsiaceae    | 1.39 | 2.42 | 2.82 | 5.01 | 16.51 | 1.06 | 1.27  | 1.29  | 1.31  | 1.33  | FALSE | 1 |
| f_Plactomycetaceae       | 1.00 | 1.15 | 1.36 | 1.68 | 2.33  | 1.00 | 1.00  | 1.00  | 1.00  | 1.01  | FALSE | 2 |
| f_Planococcaceae         | 1.00 | 1.00 | 1.02 | 1.11 | 2.03  | 1.00 | 1.00  | 1.03  | 1.10  | 1.18  | FALSE | 0 |
| f_Porphyrromonadaceae    | 1.03 | 1.05 | 1.08 | 1.15 | 1.60  | 1.00 | 1.03  | 1.06  | 1.16  | 1.17  | FALSE | 2 |
| f_Pseudoalteromonadaceae | 1.00 | 1.01 | 1.02 | 1.03 | 1.21  | 1.01 | 1.04  | 1.04  | 3.07  | 4.21  | FALSE | 0 |
| f_Pseudomonadaceae       | 1.08 | 1.17 | 2.56 | 3.53 | 6.65  | 1.80 | 11.08 | 17.45 | 19.45 | 27.52 | FALSE | 5 |
| f_Rhodobacteraceae       | 1.48 | 3.75 | 4.46 | 8.67 | 12.62 | 1.01 | 1.91  | 2.73  | 7.35  | 9.03  | FALSE | 1 |
| f_Rhodospirillaceae      | 1.29 | 1.62 | 1.85 | 2.96 | 11.57 | 1.00 | 1.00  | 1.00  | 1.00  | 1.02  | FALSE | 0 |
| f_Rikenellaceae          | 1.00 | 1.02 | 1.06 | 1.17 | 1.51  | 1.01 | 1.01  | 1.01  | 1.02  | 1.11  | FALSE | 2 |
| f_Ruminococcaceae        | 1.02 | 1.11 | 1.20 | 1.31 | 2.51  | 1.01 | 1.04  | 1.12  | 1.29  | 1.36  | FALSE | 2 |
| f_Saprospiraceae         | 1.00 | 1.00 | 1.00 | 1.06 | 1.53  | 1.00 | 1.00  | 1.00  | 1.00  | 1.00  | FALSE | 0 |
| f_Shewanellaceae         | 1.00 | 1.00 | 1.00 | 1.04 | 1.89  | 1.00 | 1.00  | 1.00  | 1.00  | 1.00  | FALSE | 0 |
| f_Simkaniaceae           | 1.00 | 1.00 | 1.00 | 1.00 | 1.26  | 1.00 | 1.00  | 1.00  | 1.00  | 1.00  | FALSE | 0 |
| f_Sinobacteraceae        | 1.00 | 1.01 | 1.05 | 1.09 | 1.28  | 1.00 | 1.00  | 1.00  | 1.00  | 1.01  | FALSE | 1 |
| f_Sphingobacteriaceae    | 1.00 | 1.00 | 1.03 | 1.11 | 1.14  | 1.00 | 1.00  | 1.00  | 1.00  | 1.00  | FALSE | 1 |
| f_Sphingomonadaceae      | 1.01 | 1.09 | 1.37 | 1.97 | 2.77  | 1.00 | 1.00  | 1.05  | 1.07  | 1.19  | FALSE | 1 |
| f_Staphylococcaceae      | 1.00 | 1.01 | 1.02 | 1.03 | 1.08  | 1.00 | 1.00  | 1.01  | 1.01  | 1.02  | FALSE | 1 |

|                             |      |      |      |       |       |      |      |      |       |       |       |   |
|-----------------------------|------|------|------|-------|-------|------|------|------|-------|-------|-------|---|
| f_Streptococcaceae          | 1.00 | 1.00 | 1.01 | 1.02  | 1.07  | 1.00 | 1.00 | 1.00 | 1.00  | 1.04  | FALSE | 0 |
| f_Syntrophobacteraceae      | 1.00 | 1.00 | 1.00 | 1.00  | 1.50  | 1.00 | 1.00 | 1.00 | 1.00  | 1.00  | FALSE | 0 |
| f_Thermaceae                | 1.01 | 1.02 | 1.03 | 1.05  | 1.32  | 1.00 | 1.01 | 1.03 | 1.07  | 1.21  | FALSE | 0 |
| f_Thermodesulfovibrionaceae | 1.00 | 1.00 | 1.02 | 1.07  | 1.34  | 1.00 | 1.01 | 1.04 | 1.09  | 1.11  | FALSE | 0 |
| f_Thiotrichaceae            | 1.00 | 1.00 | 1.01 | 1.97  | 53.58 | 1.00 | 1.00 | 1.00 | 1.00  | 1.01  | FALSE | 0 |
| f_Veillonellaceae           | 1.08 | 1.14 | 1.29 | 1.52  | 3.60  | 1.00 | 1.05 | 1.28 | 1.38  | 1.39  | FALSE | 1 |
| f_Xanthomonadaceae          | 1.00 | 1.00 | 1.00 | 1.02  | 1.27  | 1.00 | 1.03 | 1.04 | 1.04  | 1.11  | FALSE | 0 |
| g_Acinetobacter             | 1.00 | 1.00 | 1.00 | 1.20  | 1.56  | 1.00 | 1.00 | 1.14 | 1.30  | 1.32  | FALSE | 2 |
| g_Aequorivita               | 1.00 | 1.00 | 1.00 | 1.00  | 3.24  | 1.00 | 1.00 | 1.00 | 1.00  | 1.00  | FALSE | 0 |
| g_Aeromicrobium             | 1.00 | 1.00 | 1.00 | 1.00  | 1.00  | 1.00 | 1.00 | 1.00 | 1.00  | 1.86  | FALSE | 0 |
| g_Alcanivorax               | 1.24 | 2.55 | 3.33 | 4.15  | 5.47  | 1.00 | 1.00 | 1.00 | 1.00  | 1.00  | FALSE | 4 |
| g_Algoriphagus              | 1.00 | 1.00 | 1.00 | 1.00  | 2.25  | 1.00 | 1.00 | 1.00 | 1.00  | 1.00  | FALSE | 0 |
| g_Alishewanella             | 1.00 | 1.00 | 1.00 | 1.00  | 2.16  | 1.00 | 1.00 | 1.00 | 1.00  | 1.00  | FALSE | 0 |
| g_Arenibacter               | 1.00 | 2.59 | 3.61 | 4.77  | 14.36 | 1.00 | 1.00 | 1.00 | 1.00  | 1.00  | FALSE | 8 |
| g_Bacteroides               | 2.92 | 4.86 | 8.84 | 15.67 | 56.99 | 1.61 | 2.34 | 8.40 | 10.09 | 11.11 | FALSE | 0 |
| g_Balneola                  | 1.00 | 1.00 | 1.00 | 1.47  | 3.90  | 1.00 | 1.00 | 1.00 | 1.00  | 1.00  | FALSE | 0 |
| g_Bdellovibrio              | 1.00 | 1.00 | 1.00 | 1.00  | 1.12  | 1.00 | 1.00 | 1.00 | 1.00  | 1.00  | FALSE | 0 |
| g_Bizionia                  | 1.00 | 1.00 | 1.00 | 1.00  | 1.00  | 1.00 | 1.49 | 1.59 | 39.95 | 81.93 | FALSE | 0 |
| g_Burkholderia              | 1.00 | 1.00 | 1.00 | 1.13  | 2.26  | 1.00 | 1.00 | 1.00 | 1.00  | 1.32  | FALSE | 1 |
| g_Caulobacter               | 1.00 | 1.00 | 1.00 | 1.00  | 1.21  | 1.00 | 1.00 | 1.00 | 1.00  | 1.00  | FALSE | 0 |
| g_Clostridiisalibacter      | 1.00 | 1.00 | 1.00 | 1.03  | 1.22  | 1.00 | 1.00 | 1.00 | 1.00  | 1.00  | FALSE | 1 |
| g_Cobetia                   | 1.00 | 1.00 | 1.00 | 1.00  | 1.00  | 1.00 | 1.00 | 1.00 | 1.90  | 17.33 | FALSE | 0 |
| g_Congregibacter            | 1.00 | 1.00 | 1.00 | 1.00  | 1.11  | 1.00 | 1.00 | 1.00 | 1.00  | 1.00  | FALSE | 0 |
| g_Constrictibacter          | 1.00 | 1.00 | 1.00 | 1.06  | 3.02  | 1.00 | 1.00 | 1.00 | 1.00  | 1.00  | FALSE | 0 |
| g_Desulfococcus             | 1.00 | 1.00 | 1.00 | 1.19  | 1.33  | 1.00 | 1.00 | 1.00 | 1.00  | 1.00  | FALSE | 1 |
| g_Desulfotignum             | 1.00 | 1.00 | 1.00 | 1.00  | 1.65  | 1.00 | 1.00 | 1.00 | 1.00  | 1.00  | FALSE | 0 |





|                        |      |      |      |      |      |      |      |      |      |      |       |     |
|------------------------|------|------|------|------|------|------|------|------|------|------|-------|-----|
| g_Mycoplana            | 1.00 | 1.00 | 1.00 | 1.00 | 1.00 | 1.00 | 1.00 | 1.00 | 1.00 | 2.02 | FALSE | 0   |
| g_Nisaea               | 1.00 | 1.00 | 1.00 | 1.03 | 1.40 | 1.00 | 1.00 | 1.00 | 1.00 | 1.00 | FALSE | 2   |
| g_Nitratireductor      | 1.00 | 1.00 | 1.00 | 1.00 | 1.42 | 1.00 | 1.00 | 1.00 | 1.00 | 1.00 | FALSE | 1   |
| g_Nitriliruptor        | 1.00 | 1.00 | 1.00 | 1.00 | 1.10 | 1.00 | 1.00 | 1.00 | 1.00 | 1.00 | FALSE | 0   |
| g_Nocardia             | 1.00 | 1.00 | 1.00 | 1.00 | 1.18 | 1.00 | 1.00 | 1.00 | 1.00 | 1.00 | FALSE | 0   |
| g_Novosphingobium      | 1.00 | 1.00 | 1.00 | 1.19 | 2.34 | 1.00 | 1.00 | 1.00 | 1.00 | 1.00 | FALSE | 0   |
| g_Olleya               | 1.00 | 1.00 | 1.00 | 1.12 | 1.48 | 1.00 | 1.00 | 1.00 | 1.00 | 1.00 | FALSE | 2   |
| g_Opitutus             | 1.00 | 1.00 | 1.07 | 1.30 | 1.49 | 1.00 | 1.00 | 1.00 | 1.00 | 1.00 | FALSE | 1   |
| g_Oscillospira         | 1.00 | 1.00 | 1.00 | 1.00 | 1.35 | 1.00 | 1.00 | 1.00 | 1.00 | 1.00 | FALSE | 0   |
| g_Owenweeksia          | 1.00 | 1.00 | 1.00 | 1.14 | 2.25 | 1.00 | 1.00 | 1.00 | 1.00 | 1.00 | FALSE | 0   |
| g_Paenisporosarcina    | 1.00 | 1.00 | 1.00 | 1.00 | 2.16 | 1.00 | 1.00 | 1.00 | 1.00 | 1.00 | FALSE | 0   |
| g_Parabacteroides      | 1.00 | 1.00 | 1.00 | 1.00 | 1.43 | 1.00 | 1.00 | 1.00 | 1.00 | 1.00 | FALSE | 0   |
| g_Paraprevotella       | 1.00 | 1.00 | 1.04 | 1.18 | 1.52 | 1.00 | 1.00 | 1.00 | 1.11 | 1.12 | FALSE | 2   |
| g_Parvibaculum         | 1.00 | 1.00 | 1.00 | 1.38 | 2.05 | 1.00 | 1.00 | 1.00 | 1.00 | 1.00 | FALSE | 0   |
| g_Phaeobacter          | 1.00 | 1.00 | 1.00 | 1.00 | 1.65 | 1.00 | 1.00 | 1.00 | 1.00 | 1.00 | FALSE | 0   |
| g_Phascalactobacterium | 1.00 | 1.12 | 1.23 | 1.39 | 2.04 | 1.00 | 1.00 | 1.23 | 1.38 | 1.39 | FALSE | 2   |
| g_Planctomyces         | 1.00 | 1.18 | 1.30 | 1.48 | 2.26 | 1.00 | 1.00 | 1.00 | 1.00 | 1.00 | FALSE | 2   |
| g_planctomycete        | 1.00 | 1.00 | 1.00 | 1.00 | 1.60 | 1.00 | 1.00 | 1.00 | 1.00 | 1.00 | FALSE | 0   |
| g_Planomicrobium       | 1.00 | 1.00 | 1.00 | 1.00 | 1.33 | 1.00 | 1.00 | 1.00 | 1.00 | 1.00 | FALSE | 0   |
| g_Polaribacter         | 1.00 | 1.00 | 1.00 | 1.00 | 1.00 | 1.00 | 1.00 | 1.00 | 1.00 | 2.28 | FALSE | 0   |
| g_Prevotella           | 1.00 | 1.00 | 1.00 | 1.02 | 1.11 | 1.00 | 1.00 | 1.00 | 1.00 | 1.00 | FALSE | 1   |
| g_Proteinclasticum     | 1.00 | 1.00 | 1.00 | 1.00 | 2.12 | 1.00 | 1.00 | 1.00 | 1.00 | 1.00 | FALSE | 0   |
| g_Pseudidiomarina      | 1.00 | 1.00 | 1.00 | 1.00 | 1.98 | 1.00 | 1.00 | 1.00 | 1.00 | 1.00 | FALSE | 4   |
| g_Pseudoalteromonas    | 1.00 | 1.00 | 1.00 | 1.00 | 1.15 | 1.00 | 1.00 | 1.00 | 2.27 | 2.48 | FALSE | 0   |
| g_Pseudomonas          | 1.00 | 1.00 | 1.00 | 1.44 | 2.79 | 1.56 | 2.67 | 4.07 | 4.58 | 5.69 | FALSE | 8   |
| g_Psychrobacter        | 1.00 | 1.00 | 1.00 | 1.05 | 1.30 | 1.72 | 2.50 | 3.46 | 3.88 | 7.75 | TRUE  | 450 |

|                    |      |      |      |      |       |      |      |      |      |       |       |   |
|--------------------|------|------|------|------|-------|------|------|------|------|-------|-------|---|
| g_Psychroflexus    | 1.00 | 1.00 | 1.00 | 1.00 | 1.13  | 1.00 | 1.00 | 1.00 | 1.00 | 1.00  | FALSE | 1 |
| g_Psychroserpens   | 1.00 | 1.00 | 1.00 | 1.00 | 1.29  | 1.00 | 1.00 | 1.00 | 1.00 | 1.00  | FALSE | 0 |
| g_Ralstonia        | 1.00 | 1.00 | 1.00 | 1.06 | 2.28  | 1.00 | 1.00 | 1.00 | 1.26 | 1.78  | FALSE | 0 |
| g_Rhodopirellula   | 1.00 | 1.00 | 1.00 | 1.02 | 1.12  | 1.00 | 1.00 | 1.00 | 1.00 | 1.00  | FALSE | 1 |
| g_Rhodovulum       | 1.00 | 1.00 | 1.00 | 1.00 | 1.27  | 1.00 | 1.00 | 1.00 | 1.00 | 1.00  | FALSE | 0 |
| g_Roseivirga       | 1.00 | 1.09 | 1.22 | 1.74 | 2.42  | 1.00 | 1.00 | 1.00 | 1.00 | 1.00  | FALSE | 1 |
| g_Ruminococcus     | 1.00 | 1.00 | 1.00 | 1.00 | 1.20  | 1.00 | 1.00 | 1.00 | 1.00 | 1.17  | FALSE | 2 |
| g_Ruminococcus     | 1.00 | 1.54 | 2.11 | 2.58 | 5.15  | 1.10 | 1.30 | 2.00 | 2.93 | 2.94  | FALSE | 1 |
| g_Salegentibacter  | 1.00 | 1.00 | 1.87 | 3.77 | 29.44 | 4.25 | 4.45 | 5.12 | 6.75 | 47.03 | FALSE | 1 |
| g_Salinibacterium  | 1.00 | 1.00 | 1.00 | 1.00 | 1.14  | 1.00 | 1.00 | 1.00 | 1.00 | 1.34  | FALSE | 0 |
| g_Shewanella       | 1.00 | 1.00 | 1.00 | 1.02 | 1.70  | 1.00 | 1.00 | 1.00 | 1.00 | 1.00  | FALSE | 0 |
| g_Sphingomonas     | 1.00 | 1.00 | 1.00 | 1.00 | 1.46  | 1.00 | 1.00 | 1.00 | 1.00 | 1.00  | FALSE | 0 |
| g_Sphingopyxis     | 1.00 | 1.00 | 1.00 | 1.00 | 1.08  | 1.00 | 1.00 | 1.00 | 1.00 | 1.00  | FALSE | 0 |
| g_Staphylococcus   | 1.00 | 1.00 | 1.00 | 1.00 | 1.12  | 1.00 | 1.00 | 1.00 | 1.00 | 1.00  | FALSE | 0 |
| g_Stenotrophomonas | 1.00 | 1.00 | 1.00 | 1.00 | 1.22  | 1.00 | 1.00 | 1.00 | 1.00 | 1.00  | FALSE | 0 |
| g_Sutterella       | 1.00 | 1.00 | 1.00 | 1.00 | 1.22  | 1.00 | 1.00 | 1.00 | 1.00 | 1.00  | FALSE | 0 |
| g_Thalassospira    | 1.00 | 1.00 | 1.10 | 1.31 | 4.03  | 1.00 | 1.00 | 1.00 | 1.00 | 1.00  | FALSE | 0 |
| g_Thermus          | 1.00 | 1.00 | 1.00 | 1.00 | 1.26  | 1.00 | 1.00 | 1.00 | 1.00 | 1.00  | FALSE | 0 |
| g_Thiomicrospira   | 1.00 | 1.00 | 1.00 | 1.04 | 3.91  | 1.00 | 1.00 | 1.00 | 1.00 | 1.00  | FALSE | 0 |
| g_Ulvibacter       | 1.00 | 1.00 | 1.00 | 1.00 | 3.16  | 1.00 | 1.00 | 1.00 | 1.00 | 1.00  | FALSE | 0 |
| g_Winogradskyella  | 1.00 | 1.00 | 1.00 | 1.15 | 3.07  | 1.00 | 1.00 | 1.00 | 1.00 | 1.00  | FALSE | 1 |



Table S6 Taxonomic statistic of 629 isolates obtained by culture-dependent method.

| Stations          | Total | JB01 | JB02 | JB03 | JB04 | JB05 | R02 | R04 | R08 | R09 | R14 | R17 | R18 | R19 |
|-------------------|-------|------|------|------|------|------|-----|-----|-----|-----|-----|-----|-----|-----|
| Proteobacteria    | 463   | 16   | 36   | 19   | 31   | 30   | 39  | 29  | 41  | 48  | 32  | 38  | 51  | 53  |
| Caulobacterales   | 2     | 0    | 0    | 0    | 0    | 0    | 0   | 0   | 0   | 2   | 0   | 0   | 0   | 0   |
| Kiloniellales     | 17    | 1    | 6    | 4    | 0    | 0    | 1   | 0   | 1   | 1   | 0   | 2   | 1   | 0   |
| Rhizobiales       | 46    | 1    | 4    | 1    | 2    | 6    | 1   | 4   | 7   | 8   | 2   | 4   | 6   | 0   |
| Rhodobacterales   | 102   | 1    | 11   | 0    | 16   | 2    | 12  | 7   | 7   | 6   | 6   | 12  | 8   | 14  |
| Sphingomonadales  | 33    | 1    | 5    | 3    | 1    | 2    | 2   | 3   | 2   | 3   | 0   | 3   | 3   | 5   |
| Alteromonadales   | 106   | 3    | 0    | 8    | 4    | 14   | 7   | 6   | 10  | 21  | 7   | 13  | 8   | 5   |
| Oceanospirillales | 89    | 7    | 8    | 2    | 5    | 4    | 2   | 4   | 6   | 4   | 13  | 3   | 20  | 11  |
| Pseudomonadales   | 60    | 2    | 0    | 0    | 3    | 0    | 14  | 5   | 7   | 1   | 4   | 1   | 5   | 18  |
| Thiotrichales     | 6     | 0    | 0    | 1    | 0    | 2    | 0   | 0   | 1   | 2   | 0   | 0   | 0   | 0   |
| Vibrionales       | 2     | 0    | 2    | 0    | 0    | 0    | 0   | 0   | 0   | 0   | 0   | 0   | 0   | 0   |
| Bacteroidetes     | 112   | 7    | 12   | 10   | 5    | 16   | 2   | 10  | 6   | 9   | 10  | 7   | 14  | 4   |
| Cytophagales      | 41    | 1    | 3    | 3    | 3    | 11   | 0   | 2   | 1   | 2   | 5   | 0   | 8   | 2   |
| Flavobacteriales  | 71    | 6    | 9    | 7    | 2    | 5    | 2   | 8   | 5   | 7   | 5   | 7   | 6   | 2   |
| Actinobacteria    | 32    | 0    | 6    | 1    | 1    | 2    | 2   | 3   | 0   | 1   | 3   | 2   | 11  | 0   |
| Actinomycetales   | 32    | 0    | 6    | 1    | 1    | 2    | 2   | 3   | 0   | 1   | 3   | 2   | 11  | 0   |
| Firmicutes        | 22    | 2    | 2    | 0    | 1    | 1    | 1   | 1   | 2   | 0   | 4   | 1   | 7   | 0   |
| Bacillales        | 22    | 2    | 2    | 0    | 1    | 1    | 1   | 1   | 2   | 0   | 4   | 1   | 7   | 0   |
| Total isolates    | 629   | 25   | 56   | 30   | 38   | 49   | 44  | 43  | 49  | 58  | 49  | 48  | 83  | 57  |

Table S7 13 OTUs only detected by culture-dependent technique.

| Representative isolate | Number of isolates | Taxonomy                                                                                                         |
|------------------------|--------------------|------------------------------------------------------------------------------------------------------------------|
| R14-L2                 | 72                 | k__Bacteria; p__Proteobacteria; c__Alphaproteobacteria; o__Rhodobacterales; f__Rhodobacteraceae; g__             |
| R02-M33                | 15                 | k__Bacteria; p__Firmicutes; c__Bacilli; o__Bacillales; f__Bacillaceae; g__Bacillus                               |
| JB01-H21               | 13                 | k__Bacteria; p__Proteobacteria; c__Gammaproteobacteria; o__Pseudomonadales; f__Pseudomonadaceae; g__Pseudomonas  |
| R09-M3                 | 8                  | k__Bacteria; p__Proteobacteria; c__Alphaproteobacteria; o__Rhizobiales; f__Aurantimonadaceae; g__Martellella     |
| R14-M11                | 3                  | k__Bacteria; p__Actinobacteria; c__Actinobacteria; o__Actinomycetales; f__Microbacteriaceae; g__Microbacterium   |
| JB03-H2                | 2                  | k__Bacteria; p__Actinobacteria; c__Actinobacteria; o__Actinomycetales; f__Nocardioidaceae; g__                   |
| JB03-H15               | 2                  | k__Bacteria; p__Bacteroidetes; c__Cytophagia; o__Cytophagales; f__Flammeovirgaceae; g__                          |
| JB04-L15               | 2                  | k__Bacteria; p__Actinobacteria; c__Actinobacteria; o__Actinomycetales; f__Nocardiaceae; g__Rhodococcus           |
| JB05-M4                | 2                  | k__Bacteria; p__Proteobacteria; c__Alphaproteobacteria; o__Rhodobacterales; f__Rhodobacteraceae; g__             |
| JB05-H15               | 1                  | k__Bacteria; p__Proteobacteria; c__Alphaproteobacteria; o__Rhizobiales; f__Hyphomicrobiaceae; g__Devosia         |
| R17-H7                 | 1                  | k__Bacteria; p__Actinobacteria; c__Actinobacteria; o__Actinomycetales; f__Microbacteriaceae; g__Agrococcus       |
| R17-H8A                | 1                  | k__Bacteria; p__Actinobacteria; c__Actinobacteria; o__Actinomycetales; f__Micrococcaceae; g__                    |
| R17-H24                | 1                  | k__Bacteria; p__Proteobacteria; c__Gammaproteobacteria; o__Alteromonadales; f__Alteromonadaceae; g__Marinobacter |

Table S8 Top 10 OTUs preferred by culture-dependent technique. Abundance ratio was calculated by dividing the abundance of culture-dependent OTUs with the abundance of culture-independent OTUs.

| OTU    | Abundance ratio | Taxonomy                                                                                                          |
|--------|-----------------|-------------------------------------------------------------------------------------------------------------------|
| OTU121 | 106.90          | k__Bacteria; p__Actinobacteria; c__Actinobacteria; o__Actinomycetales; f__Microbacteriaceae; g__Salinibacterium   |
| OTU84  | 73.57           | k__Bacteria; p__Proteobacteria; c__Alphaproteobacteria; o__Rhizobiales; f__Aurantimonadaceae; g__                 |
| OTU104 | 47.52           | k__Bacteria; p__Proteobacteria; c__Gammaproteobacteria; o__Pseudomonadales; f__Pseudomonadaceae; g__Pseudomonas   |
| OTU86  | 43.15           | k__Bacteria; p__Proteobacteria; c__Alphaproteobacteria; o__Caulobacterales; f__Caulobacteraceae; g__Brevundimonas |
| OTU113 | 43.15           | k__Bacteria; p__Bacteroidetes; c__Flavobacteriia; o__Flavobacteriales; f__Flavobacteriaceae; g__Zhouia            |
| OTU166 | 32.36           | k__Bacteria; p__Proteobacteria; c__Deltaproteobacteria; o__DTB120; f__; g__                                       |
| OTU304 | 26.81           | k__Bacteria; p__Proteobacteria; c__Gammaproteobacteria; o__Pseudomonadales; f__Pseudomonadaceae; g__              |
| OTU188 | 21.57           | k__Bacteria; p__Proteobacteria; c__Alphaproteobacteria; o__Rhizobiales; f__Hyphomicrobiaceae; g__Devosia          |
| OTU67  | 14.69           | k__Bacteria; p__Bacteroidetes; c__Cytophagia; o__Cytophagales; f__Cyclobacteriaceae; g__                          |
| OTU68  | 14.43           | k__Bacteria; p__Firmicutes; c__Bacilli; o__Bacillales; f__Planococcaceae; g__Planomicrobium                       |
| OTU368 | 12.24           | k__Bacteria; p__Proteobacteria; c__Gammaproteobacteria; o__Alteromonadales; f__Alteromonadaceae; g__Glaciecola    |
| OTU244 | 12.13           | k__Bacteria; p__Proteobacteria; c__Alphaproteobacteria; o__Kiloniellales; f__Kiloniellaceae; g__Thalassospira     |
| OTU29  | 12.06           | k__Bacteria; p__Proteobacteria; c__Gammaproteobacteria; o__Oceanospirillales; f__Halomonadaceae; g__Halomonas     |
| OTU83  | 11.92           | k__Bacteria; p__Actinobacteria; c__Actinobacteria; o__Actinomycetales; f__Nocardioidaceae; g__Aeromicrobium       |
| OTU132 | 11.62           | k__Bacteria; p__Firmicutes; c__Bacilli; o__Bacillales; f__Bacillaceae; g__Marinibacillus; g__                     |
| OTU6   | 10.18           | k__Bacteria; p__Bacteroidetes; c__Cytophagia; o__Cytophagales; f__Cyclobacteriaceae; g__                          |

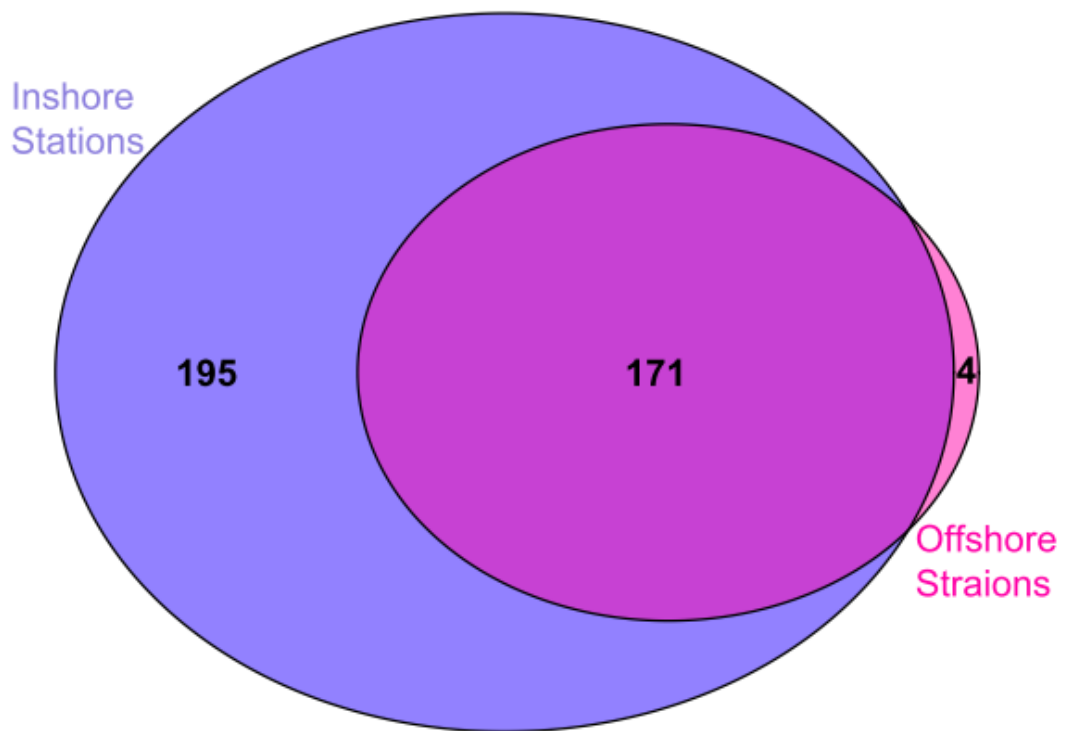

Fig. S1 Venn diagram of OTUs detected in inshore (violet) and offshore samples (pink).

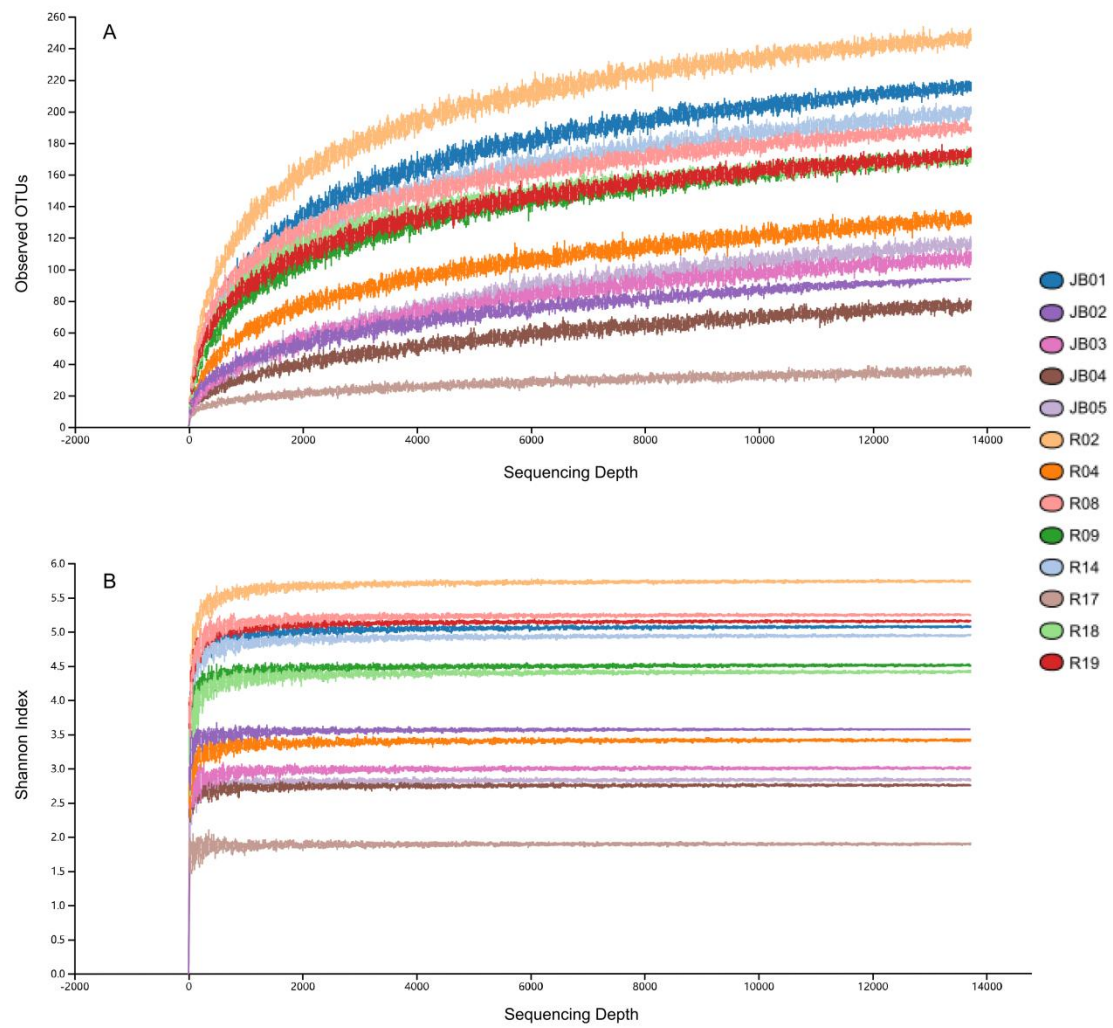

Fig. S2 Rarefaction curves of high-throughput sequencing of 16S rRNA gene amplicons. A, rarefaction curves based on observed OTUs; B, rarefaction curves based on Shannon index.



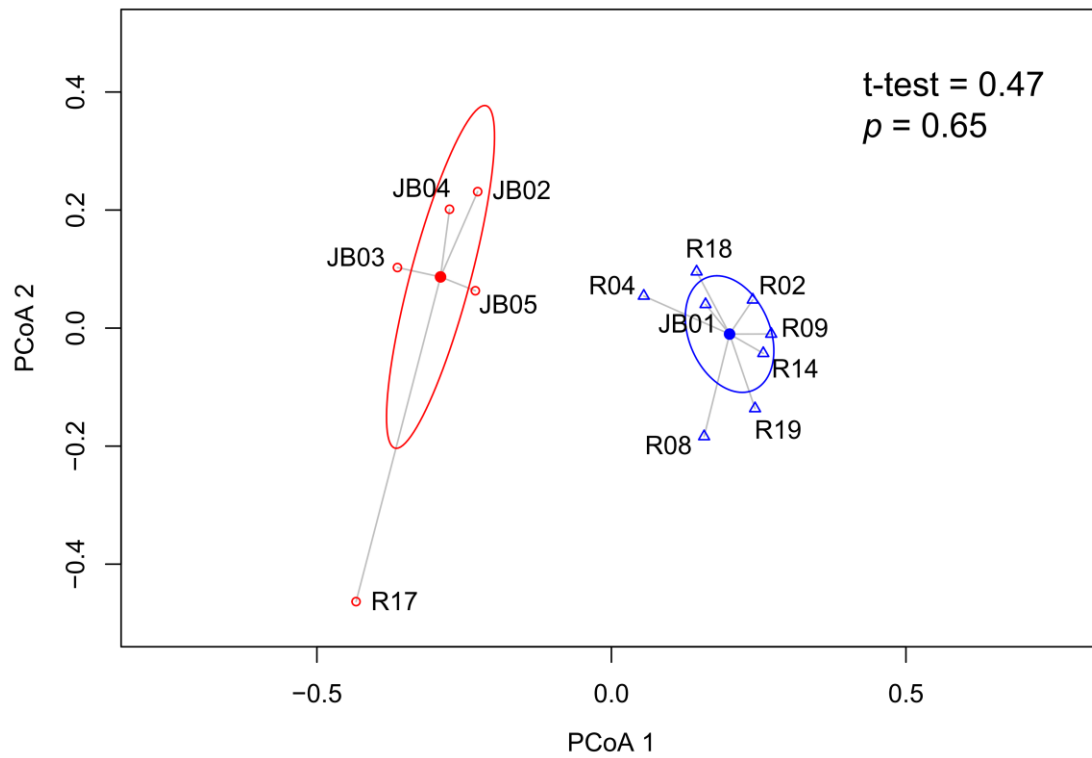

Fig. S3 Distribution of Jaccard dissimilarity within inshore group and offshore group, respectively. Jaccard distances between samples and group centroids were handled by reducing the original distances to principal coordinates. Solid circles were group centroids; red, offshore group; blue, inshore group.

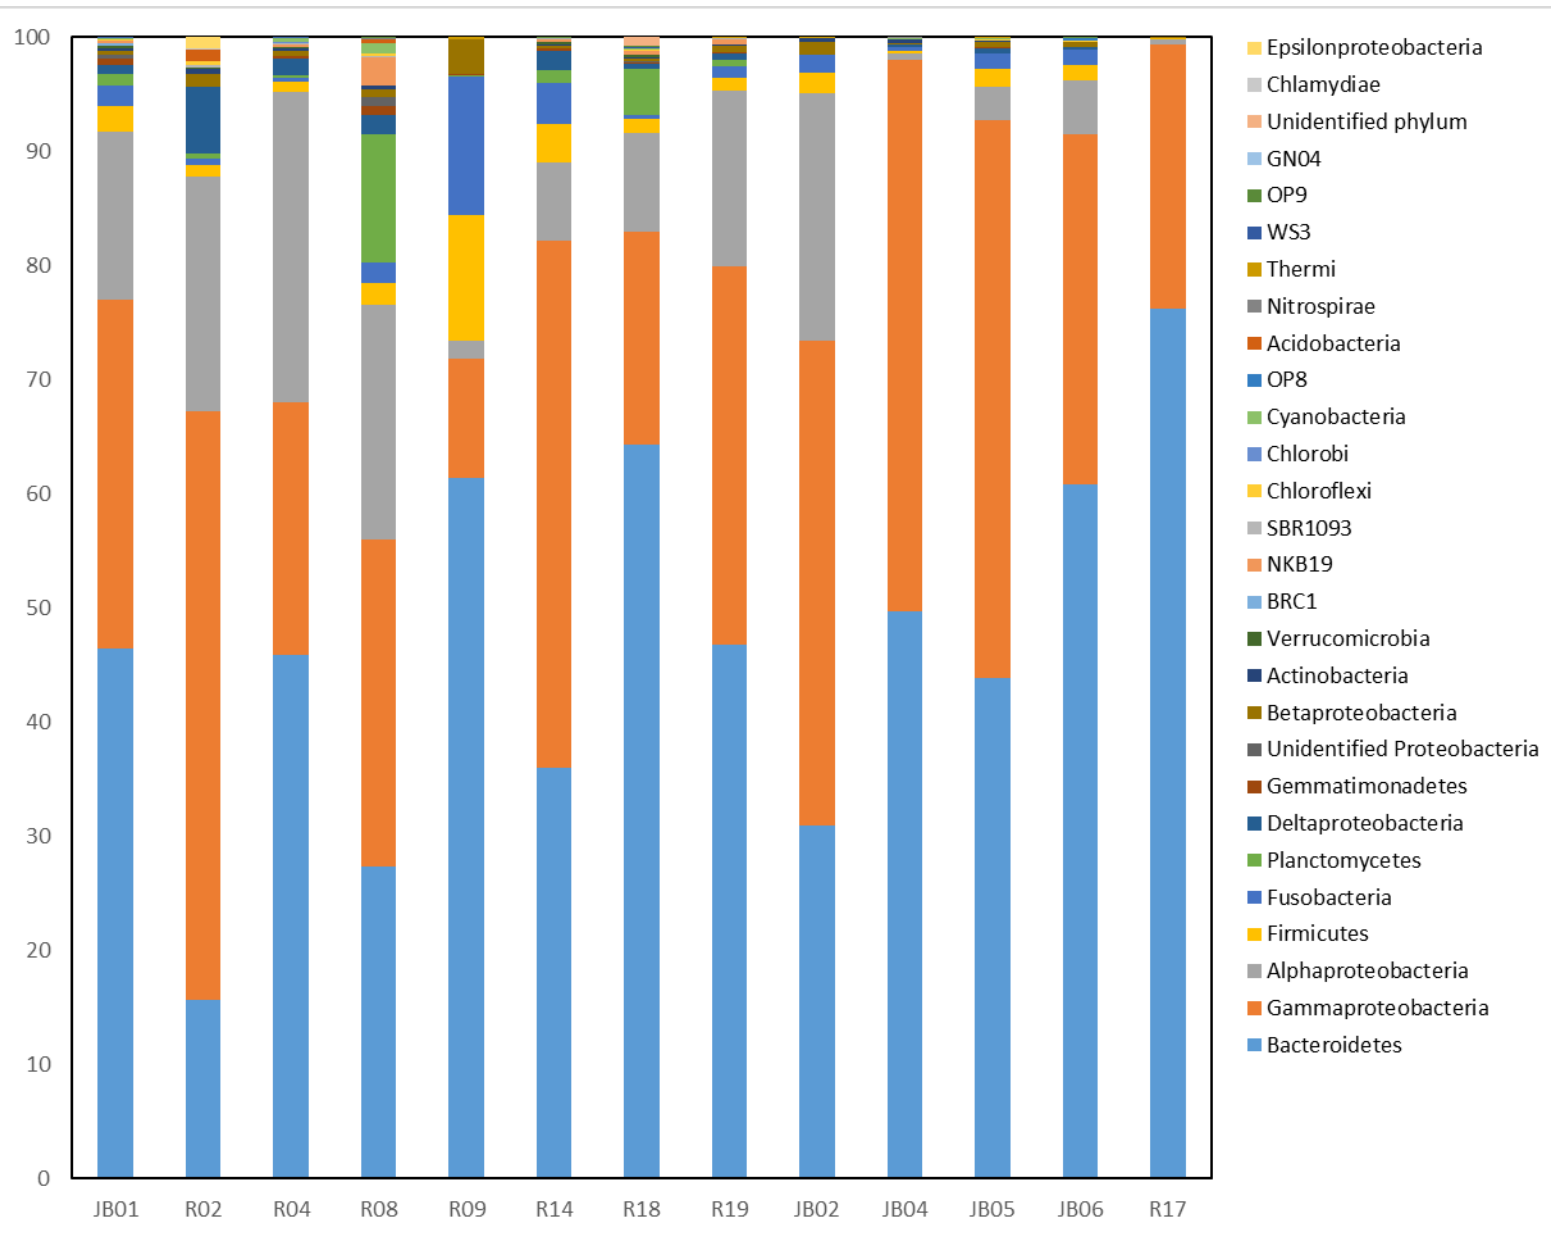

Fig. S4 Composition of bacterial community in the Ross Sea sediments. Bar charts showed the relative abundance of bacterial taxa in each of the sediments at phylum level (*Proteobacteria* was presented at class level).

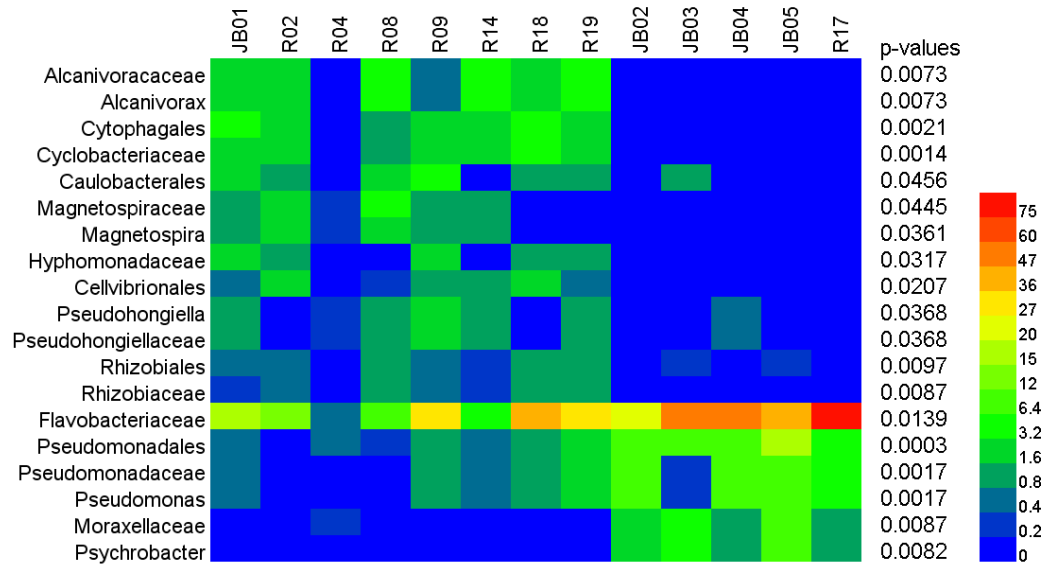

Fig. S5 Indicative taxa with significantly different distributions between inshore and offshore group. Welch's t-test was performed by R. Color indicates the abundance (%) of given taxa.

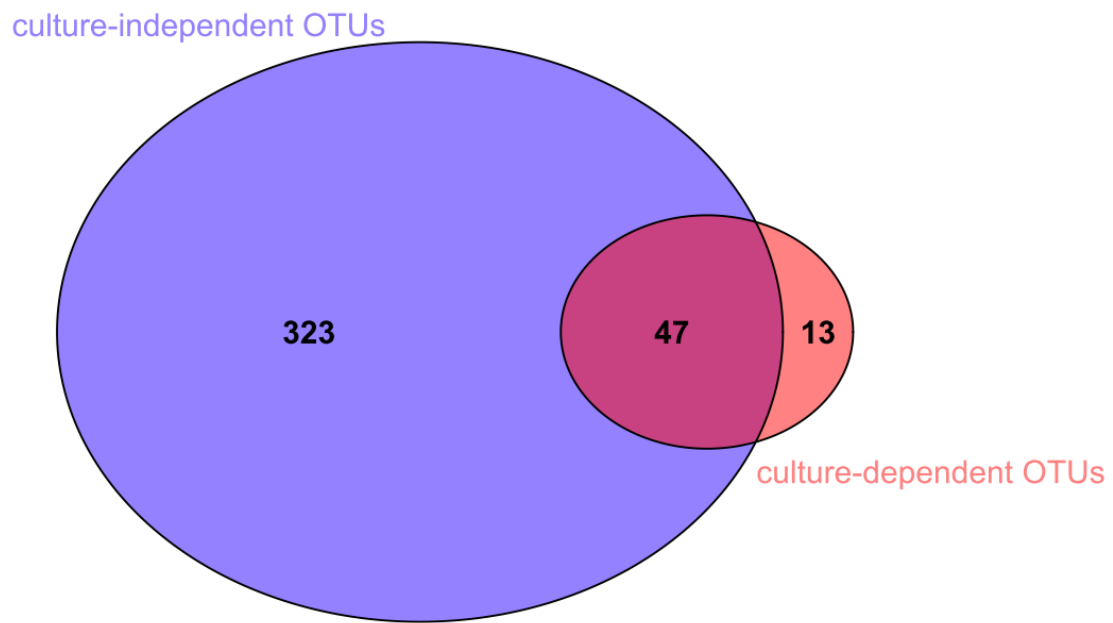

Fig. S6 Venn diagram of OTUs revealed by culture-dependent (coral) and -independent (violet) approaches.

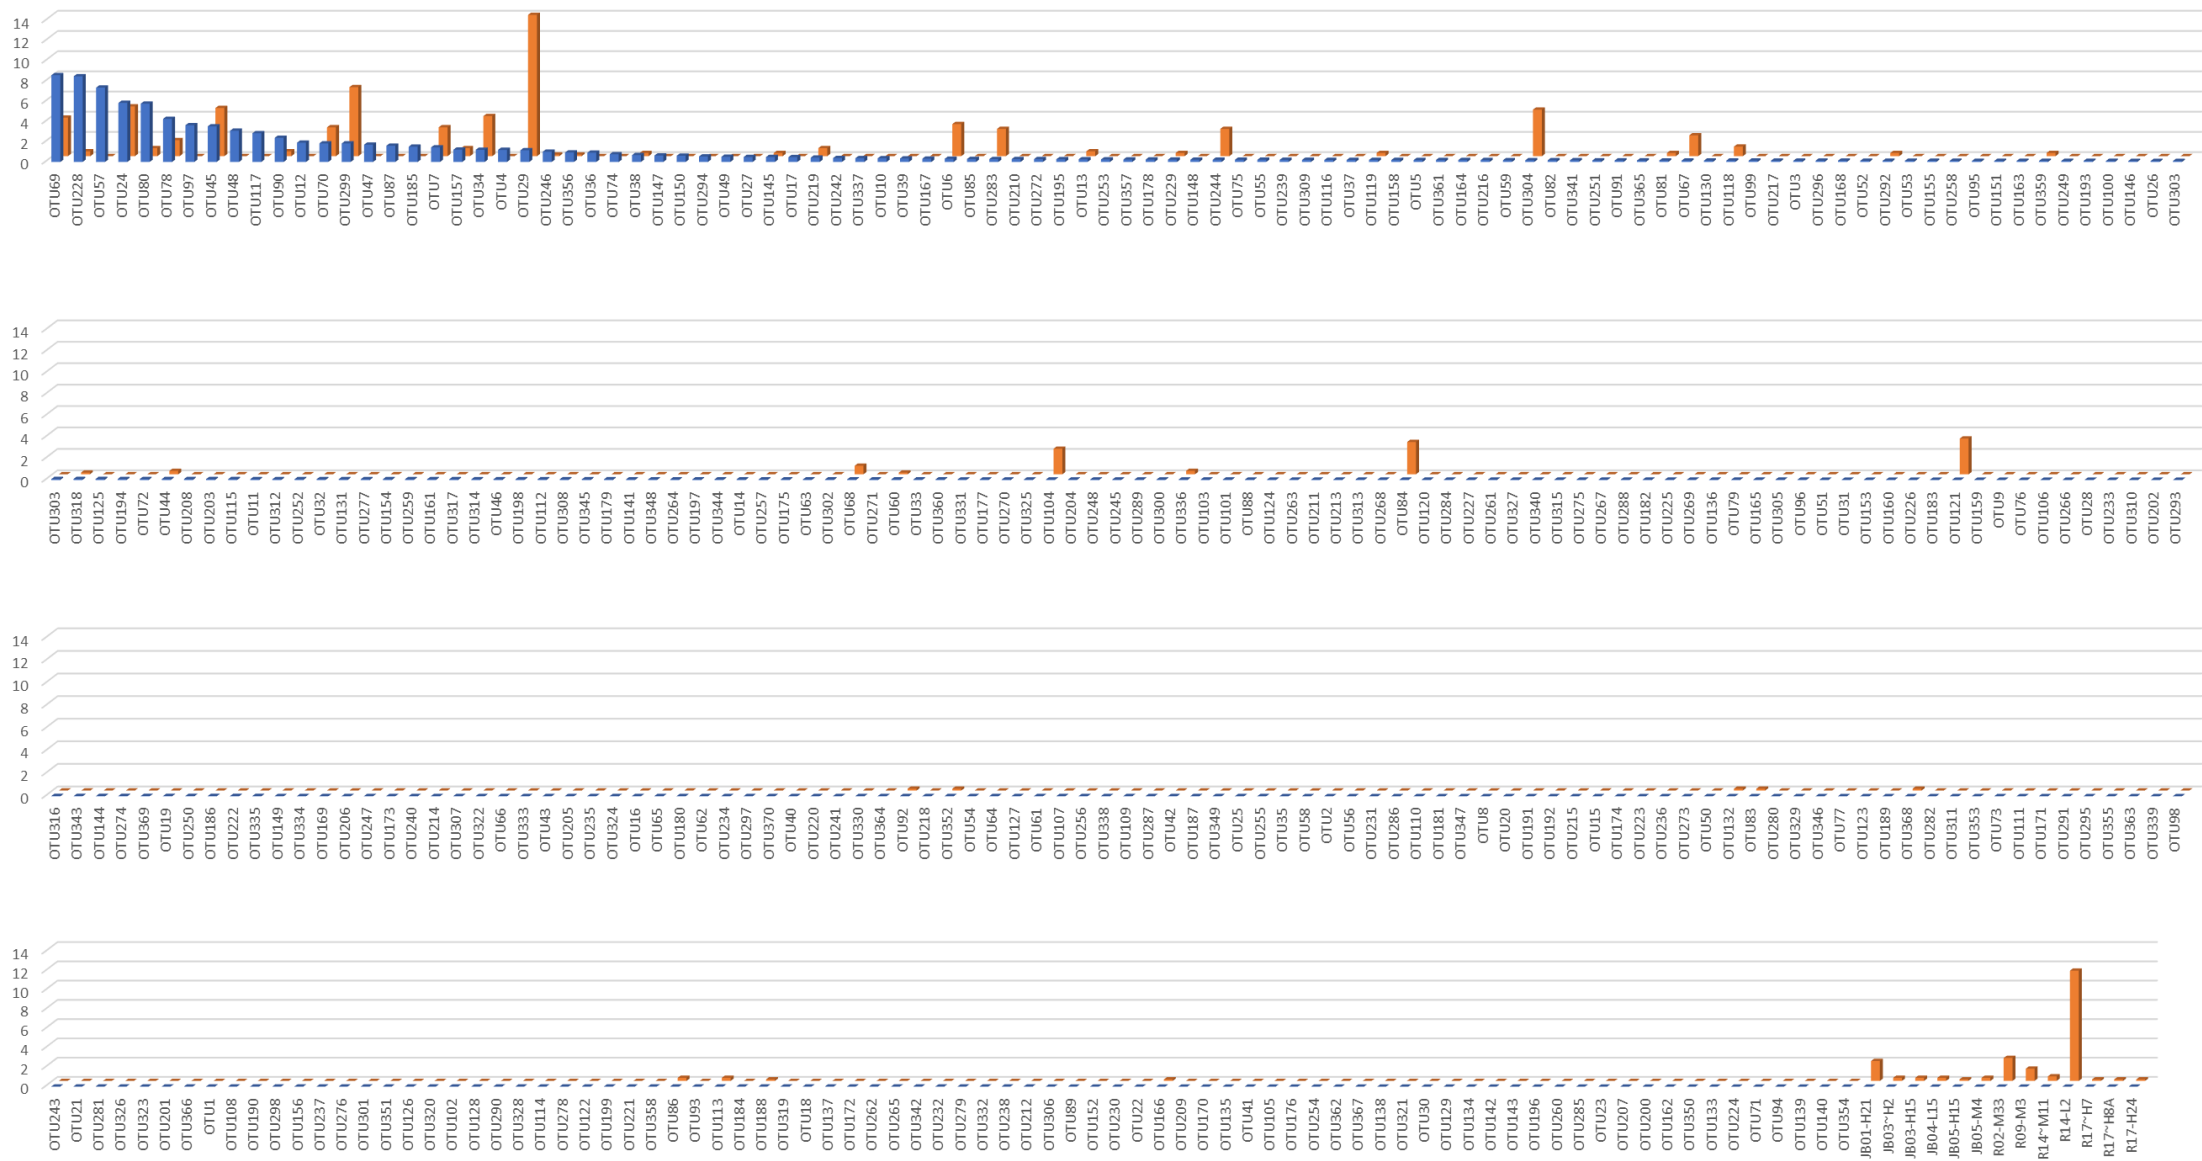

Fig. S7 Comparison of OTU abundance revealed by culture-dependent and -independent approaches. The Y-axis showed the percentage of a given OTU.
